# Supplementary material for: Extracellular miRNA-21 as a novel biomarker in glioma: evidence from meta-analysis, clinical validation and experimental investigations
Source: PubMed Central journal article supplement (PMC5085133; doi:10.18632/oncotarget.9188), 2016-05-05
Supplement: oncotarget-07-33994-s001.pdf [file oncotarget-07-33994-s001.pdf]

## Extracellular miRNA-21 as a novel biomarker in glioma: evidence from meta-analysis, clinical validation and experimental investigations

### Supplementary Materials

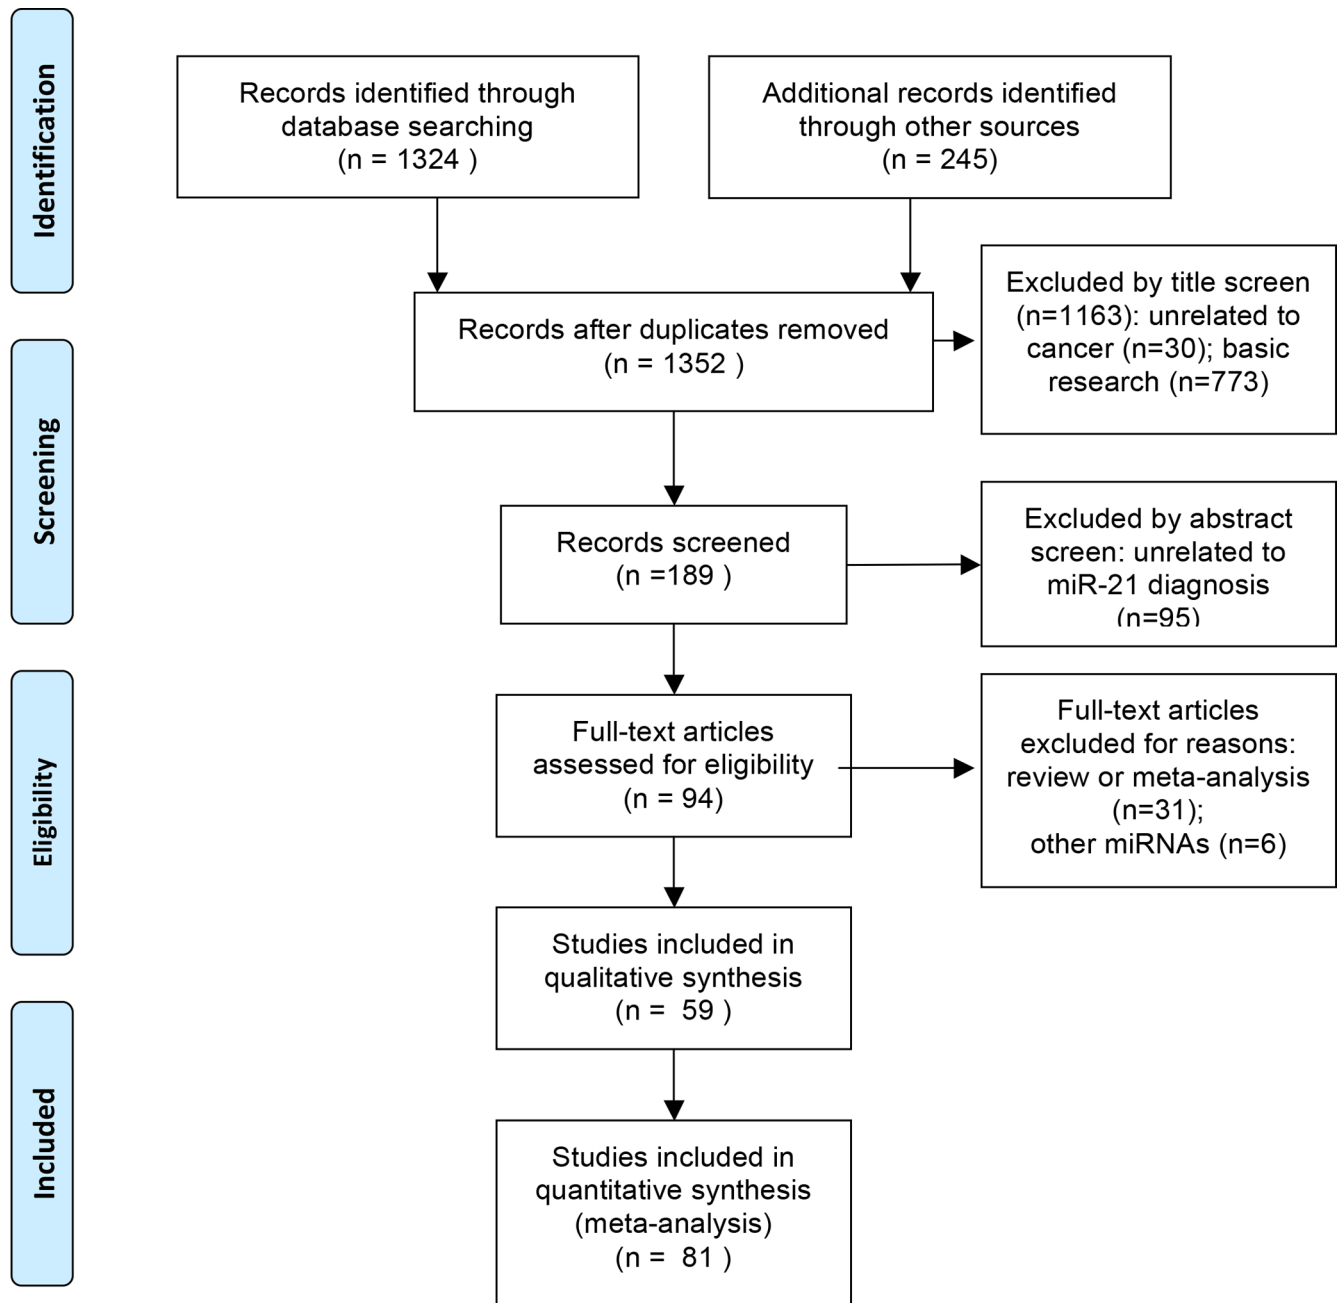

Supplementary Figure S1: Flow diagram of the selected eligible studies based on the inclusion and exclusion criteria.

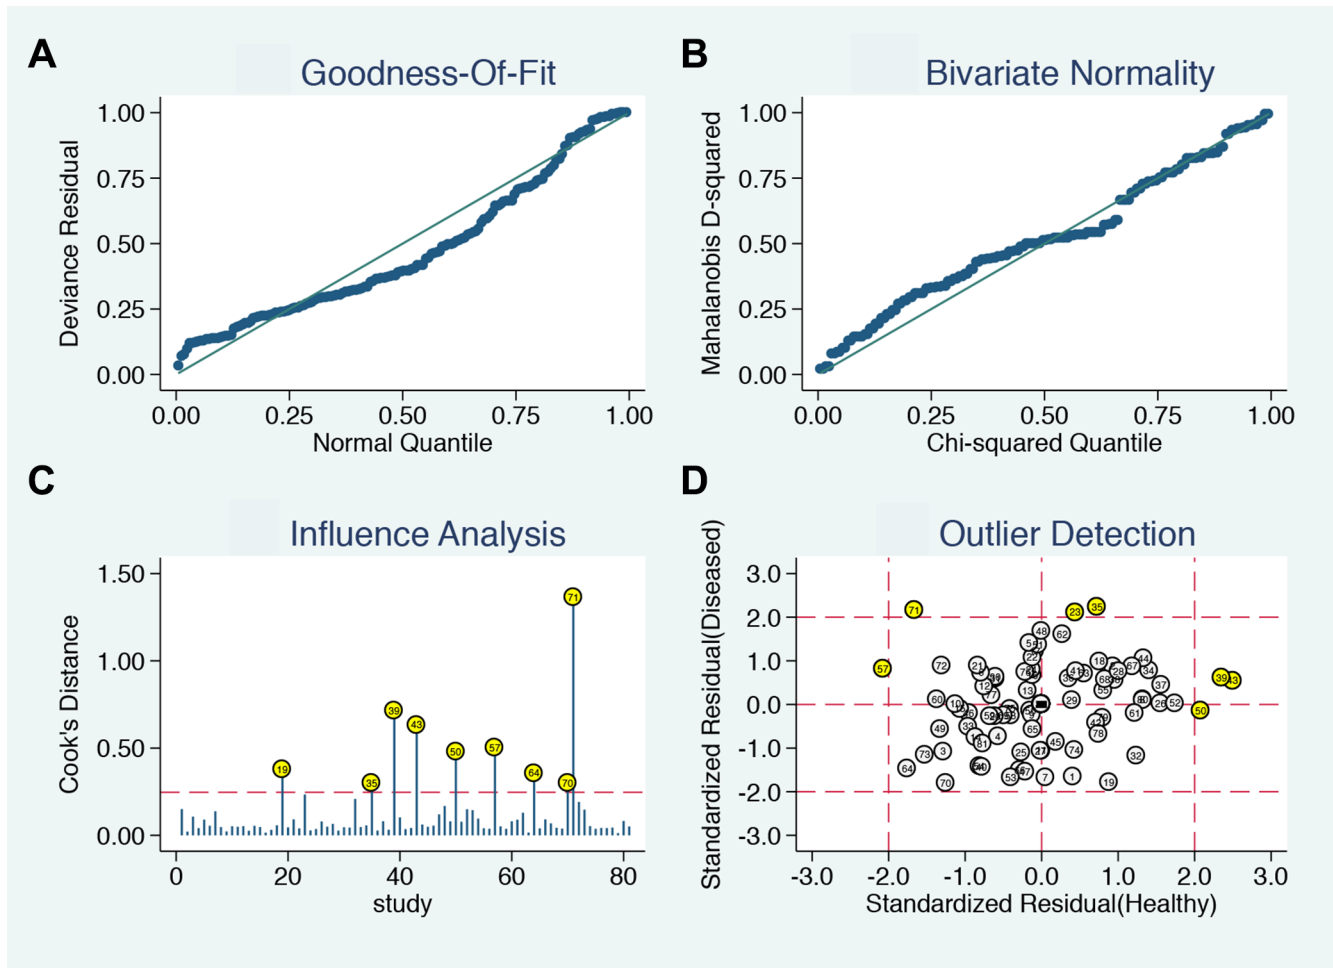

Supplementary Figure S2: Sensitivity analysis (A) goodness-of-fit; (B) bivariate normality; (C) influence analysis; (D) outlier detection.

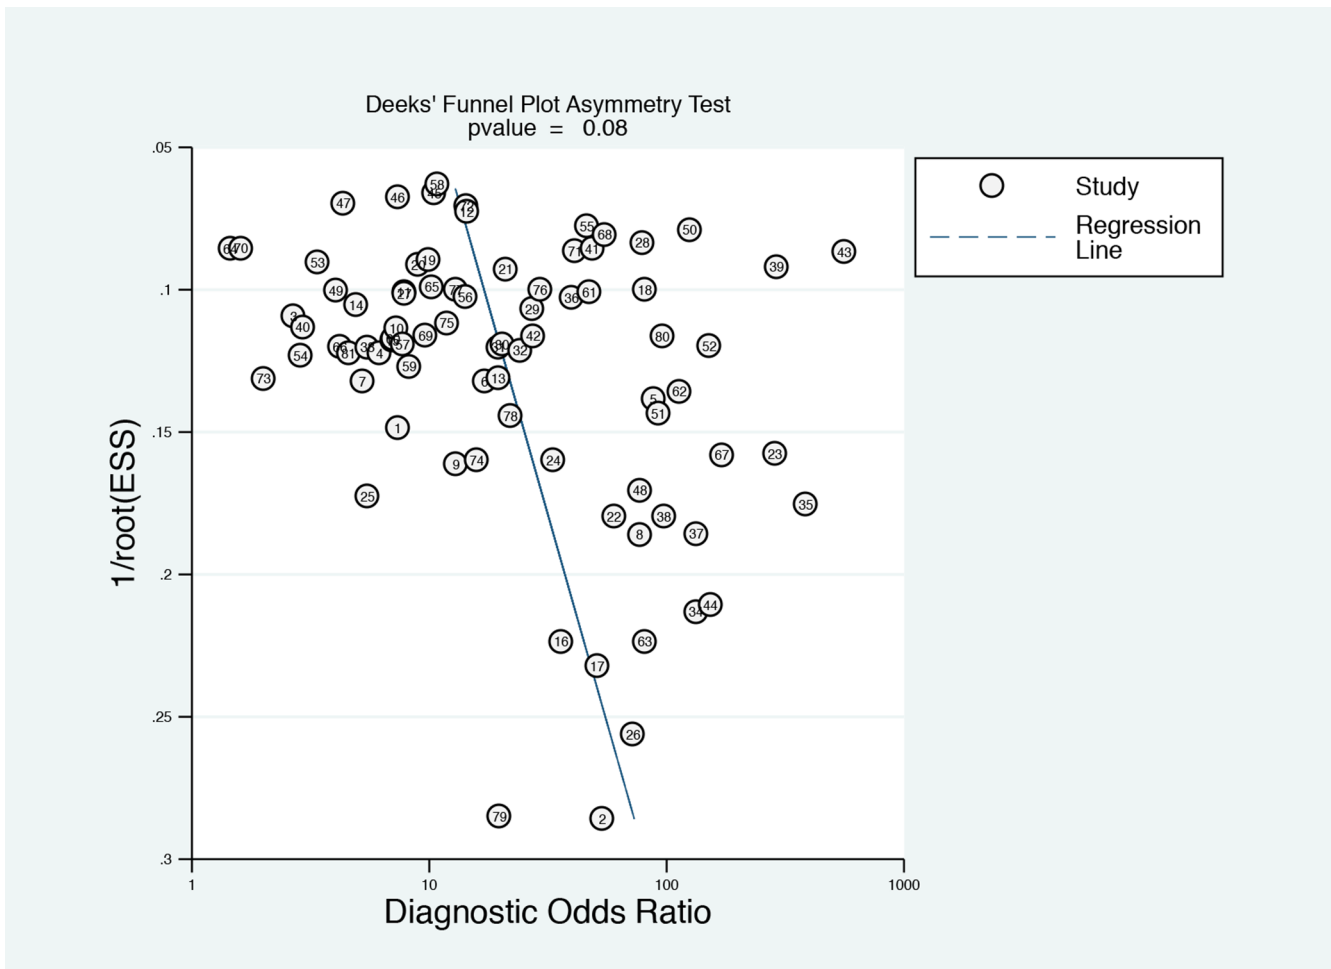

Supplementary Figure S3: Funnel graph for the assessment of potential publication bias for overall studies.

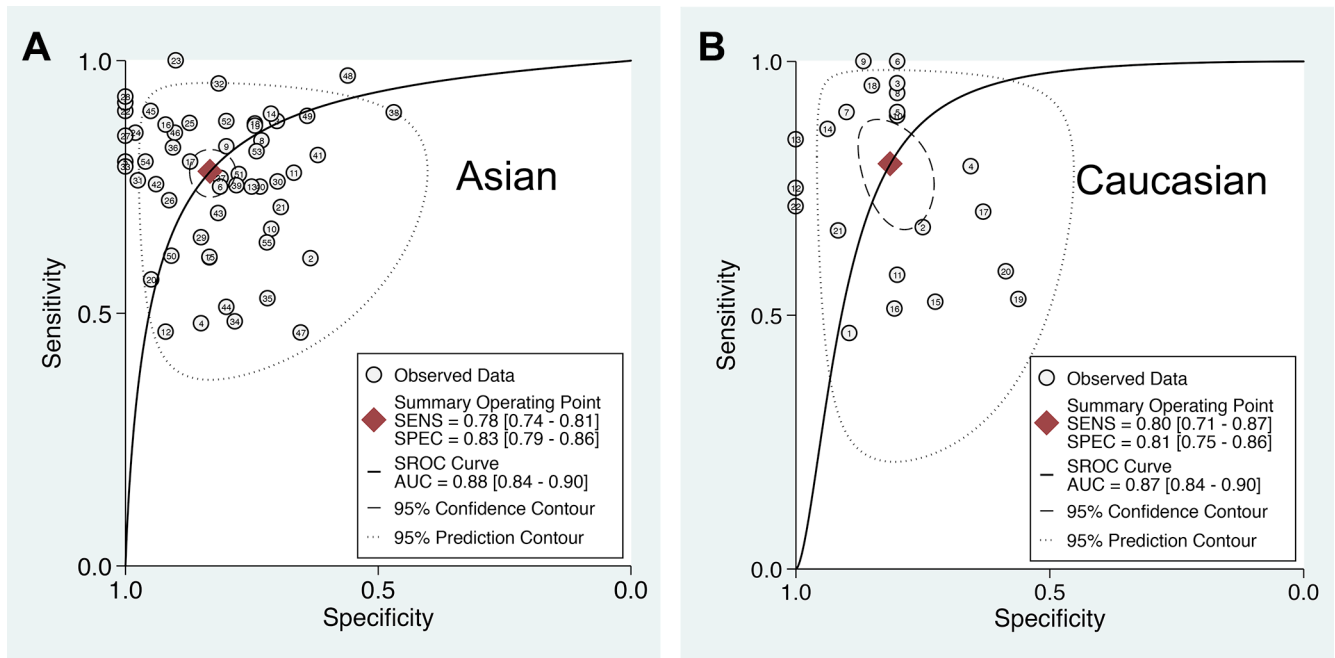

**Supplementary Figure S4: Summary ROC curve of extracellular miR-21 diagnostic values in different ethnic population. (A) Asian; (B) Caucasian.**

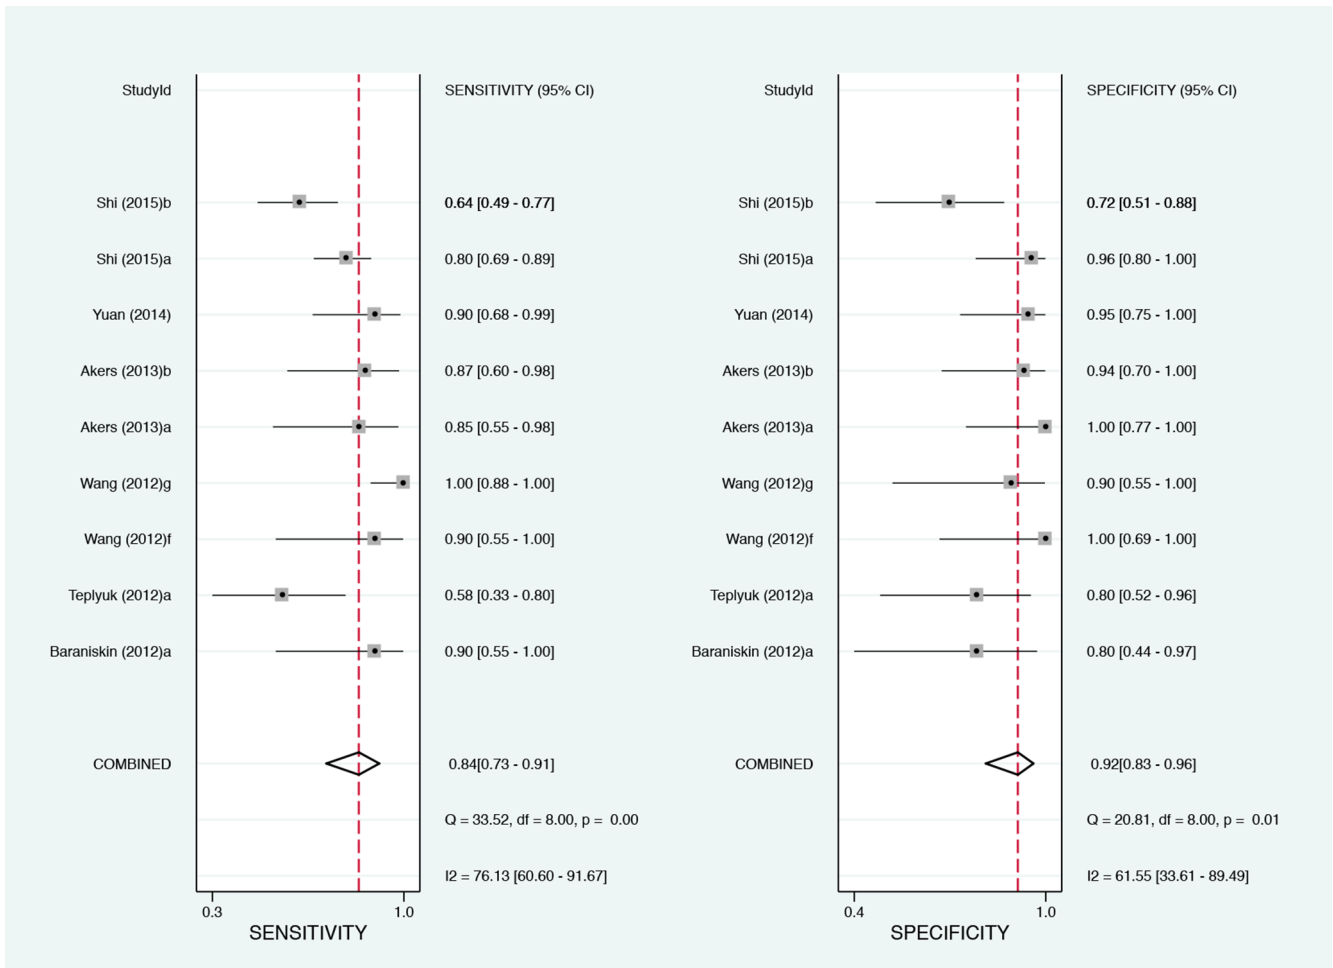

**Supplementary Figure S5: Forest plots of sensitivities and specificities for CSF-based miR-21 test accuracy in glioma.**

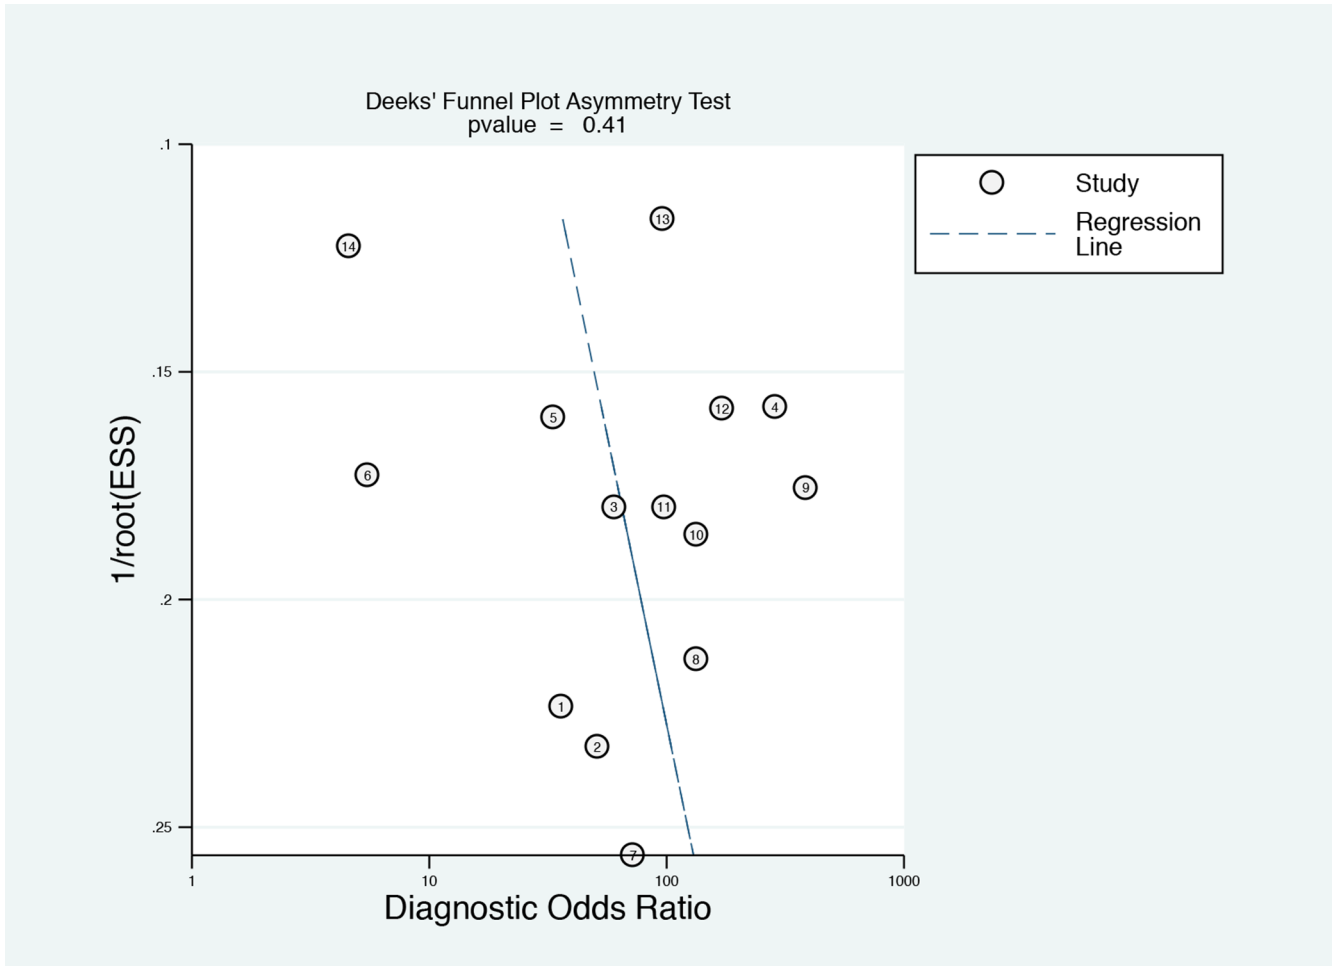

Supplementary Figure S6: Funnel graph for the assessment of potential publication bias for brain tumor subgroup.

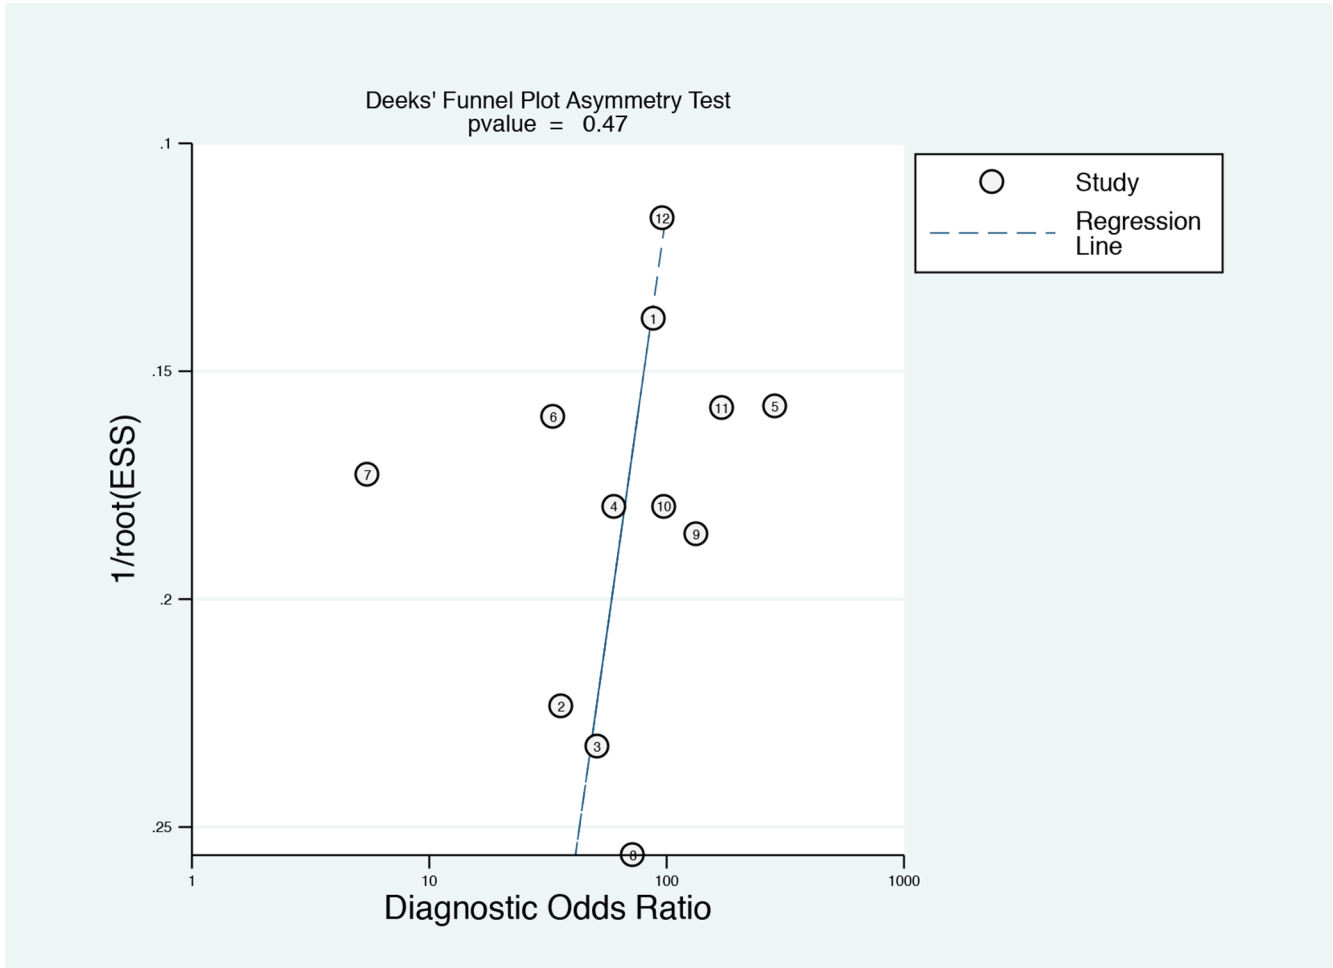

Supplementary Figure S7: Funnel graph for the assessment of potential publication bias for CSF-based miR-21 subgroup.

**A**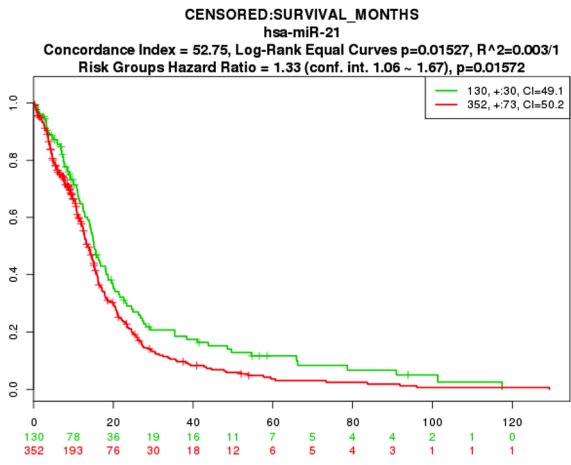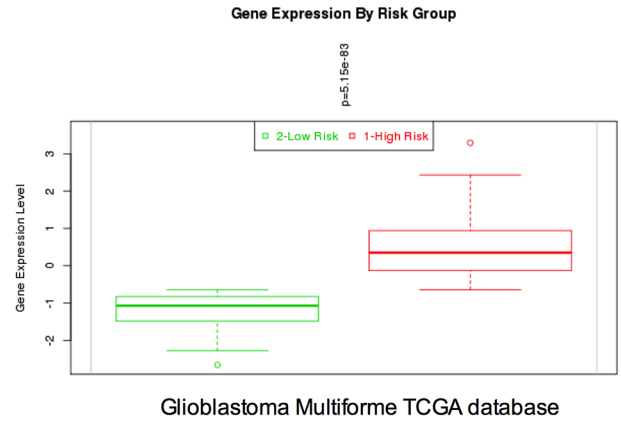**B**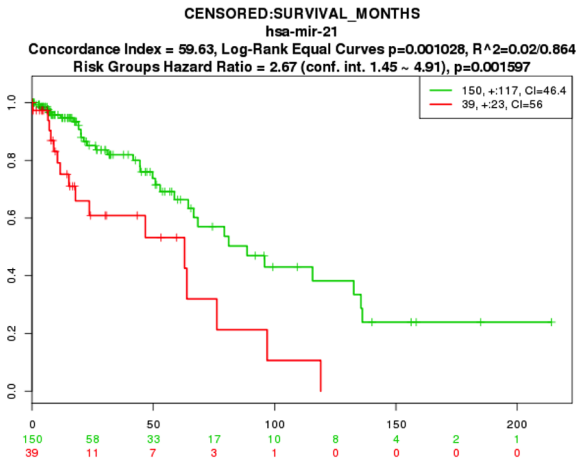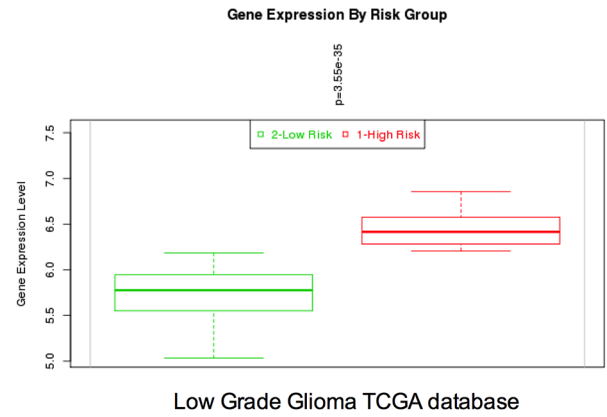

Supplementary Figure S8: Kaplan-Meier survival curves for patients with glioma and high or low miR-21 expression using TCGA databases. (A) Glioblastoma multiforme TCGA database; (B) Low grade glioma TCGA database.



**Supplementary Table S1: Characteristics of diagnostic clinical trials included in the meta-analysis.**  
See Supplementary\_Table\_S1

**Supplementary Table S2: Patients' clinicopathological characters in our validation cohort (N = 35)**

| <b>Variables</b>        | <b>Value</b> |
|-------------------------|--------------|
| No. patients            | 35           |
| Age, median (range), yr | 52 (45–71)   |
| Male, No. (%)           | 21 (60.0%)   |
| KPS score               |              |
| ≥ 80                    | 11 (31.4)    |
| < 80                    | 24 (68.6)    |
| Grade                   |              |
| WHO II                  | 9 (25.7)     |
| WHO III                 | 11 (31.4)    |
| WHO IV                  | 15 (42.9)    |
| Recurrence, No. (%)     | 18 (51.4)    |
| Death, No. (%)          | 27 (77.1)    |

KPS, Karnofsky performance status.
